# Supplementary material for: Neutrophil gelatinase-associated lipocalin in dehydrated horses: A prospective case-control study
Source: Research Square preprint supplement (doi:10.21203/rs.3.rs-1452690/v2), 2022-06-16
Supplement: Supplementary file 1 [file 805cff7eb984b8fb61cbb02d.docx]

**Additional file 1** Parameters used for estimation of dehydration in the horse

| % Dehydration | Heart Rate  (Beats/Min.) | CRT  (Seconds) | PCV  (%/) | TP  (g/L) |
| --- | --- | --- | --- | --- |
| 6 | 40-60 | 2 | 40 | 70 |
| 8 | 61-80 | 3 | 45 | 75 |
| 10 | 81-100 | 4 | 50 | 80 |
| 12 | >100 | >4 | >50 | >80 |

Abbreviations: CRT, capillary refill time; PCV, packed cell volume; TP, total protein.
