# Supplementary material for: Neutrophil gelatinase-associated lipocalin in dehydrated horses: A prospective case-control study
Source: Research Square preprint supplement (doi:10.21203/rs.3.rs-1452690/v2), 2022-06-16

**Additional file 2** Performance characteristics of 049 horse NGAL ELISA Kit

a. Intra-assay (within-run) and inter-assay (between-run) reproducibility of 049 Kit

| Sample | Mean NGAL concentration (ng/mL) | CV Intra-assay | CV Inter-assay |
| --- | --- | --- | --- |
| S-L | 31.6 | 6% | 3% |
| S-M | 228.0 | 7% | 7% |
| S-H | 358.4 | 6% | 3% |
| P-L | 37.8 | 5% | 4% |
| P-M | 194.1 | 4% | 5% |
| P-H | 342.1 | 4% | 5% |
| U-L | 31.1 | 5% | 8% |
| U-M | 167.2 | 7% | 4% |
| U-H | 307.4 | 7% | 8% |
| SF-L | 29.2 | 7% | 12% |
| SF-M | 172.0 | 3% | 6% |
| SF-H | 247.8 | 4% | 7% |

Abbreviations: CV, coefficient of variation; H, high concentrations of NGAL; L, low concentrations of NGAL; M, medium concentrations of NGAL; P, EDTA plasma; S, serum; SF, synovial fluid; U, urine.

b. Linearity

| Sample | Recoverya |
| --- | --- |
| Serum L, M, H | 84%-101% |
| Plasma L, M, H | 94%-116% |
| Serum L, M, H | 87%-119% |
| Serum L, M, H | 84%-101% |

Abbreviations: H, high concentrations of NGAL; L, low concentrations of NGAL; M, medium concentrations of NGAL.

aRecovery = measured concentration/ expected concentration*100.

c. Protocol schematic overview


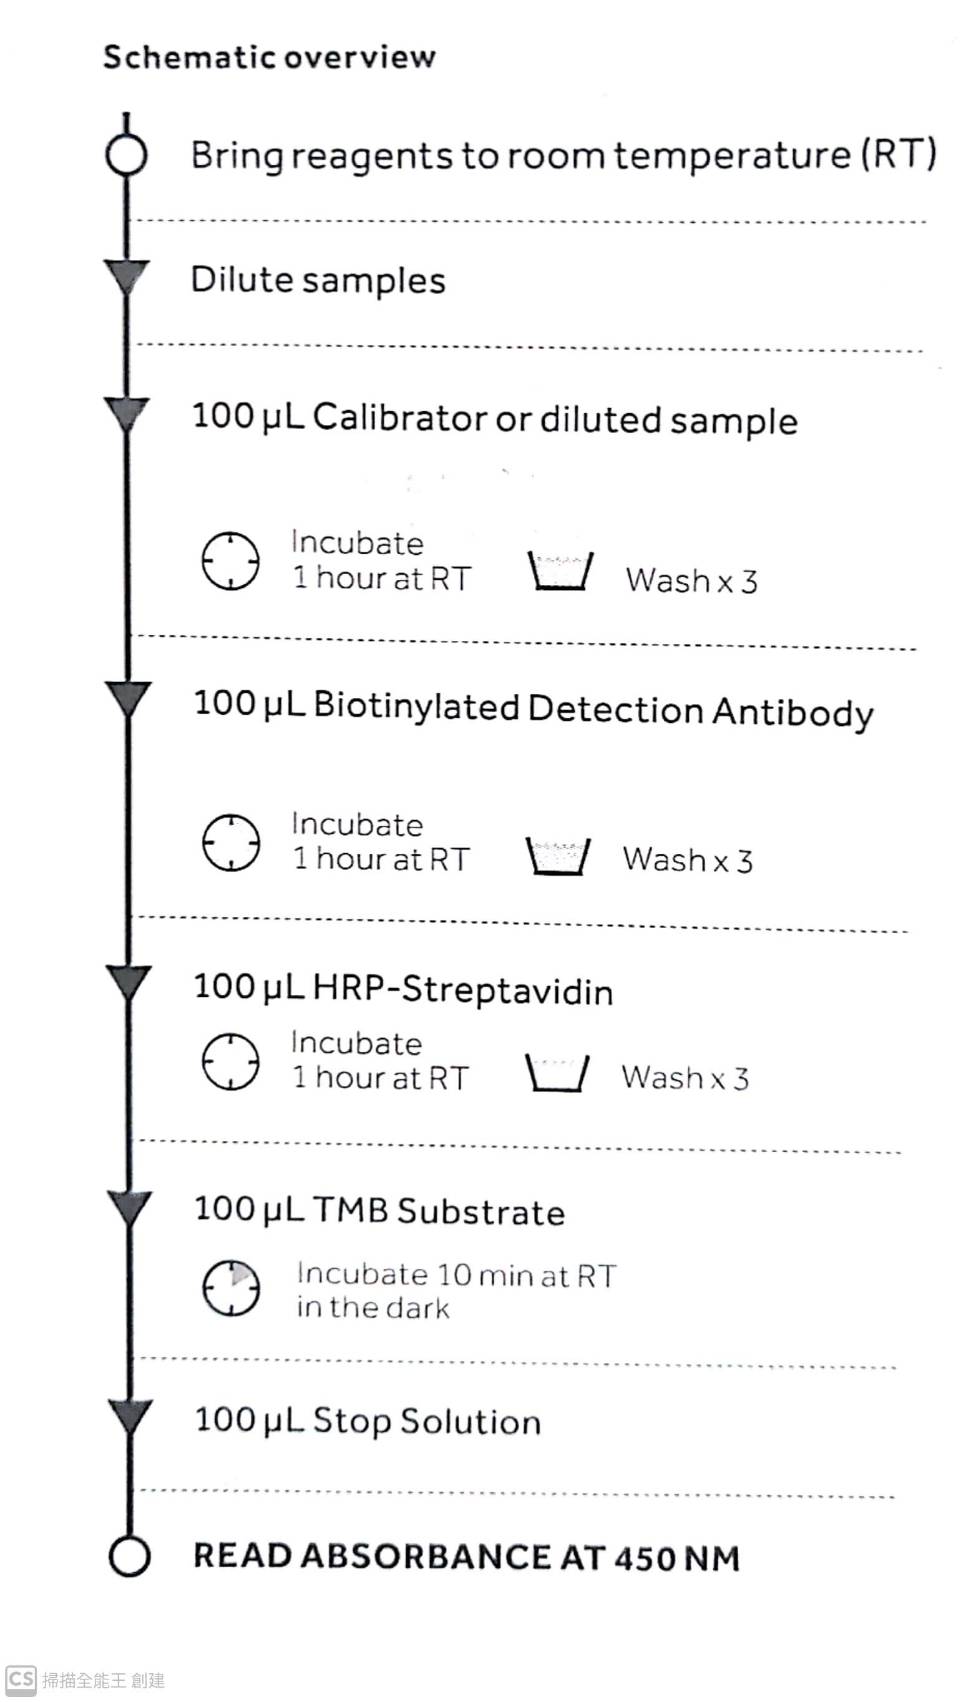

Supplement: Supplementary file 3 [file aefa7c51017cfc82d9b20f85.docx]
